# Supplementary material for: Characterization of the HDAC/PI3K inhibitor CUDC-907 as a novel senolytic
Source: publisher site journal article supplement (doi:10.18632/aging.204616), 2023-03-28
Supplement: Supplementary file [file aging-v15i7-204616-supplementary-material-SD2.pdf]

## SUPPLEMENTARY TABLES

**Supplementary Table 1. IC<sub>50</sub> values (drug concentration in which the metabolic activity was reduced 50%, in  $\mu\text{M}$ ) of EJp53, EJp16, EJp21, H522 and HCT116 treated with CUDC-907, taken from the results shown in Figures 2A, 2C.**

| Cell line | CUDC-907 IC <sub>50</sub> ( $\mu\text{M}$ ) |           |
|-----------|---------------------------------------------|-----------|
|           | Control                                     | Senescent |
| EJp53     | 0.09984                                     | 0.003880  |
| EJp21     | 1.161                                       | 1.218     |
| EJp16     | 0.2781                                      | 0.3555    |
| H522      | 0.1320                                      | 0.02417   |
| HCT116    | 0.008709                                    | 0.005477  |

**Supplementary Table 2. IC<sub>50</sub> values (in  $\mu\text{M}$ ) of EJp53, H522 and HCT116 treated with CUDC, dactolisib, panobinostat, buparlisib, CI-994 or roctilinoestat, taken from the results shown in Figures 3A, 4C.**

| Cell line | Dactolisib IC <sub>50</sub> ( $\mu\text{M}$ ) |           |
|-----------|-----------------------------------------------|-----------|
|           | Control                                       | Senescent |
| EJp53     | 18.10                                         | 0.9500    |
| H522      | 21.18                                         | 1.320     |
| HCT116    | 11.15                                         | 5.686     |

| Cell line | Panobinostat IC <sub>50</sub> ( $\mu\text{M}$ ) |           |
|-----------|-------------------------------------------------|-----------|
|           | Control                                         | Senescent |
| EJp53     | 0.1176                                          | 0.02236   |
| H522      | 3.359                                           | 0.05717   |
| HCT116    | 0.02726                                         | ~ 0.02741 |

| Cell line | Buparlisib IC <sub>50</sub> ( $\mu\text{M}$ ) |           |
|-----------|-----------------------------------------------|-----------|
|           | Control                                       | Senescent |
| EJp53     | 14.26                                         | 4.556     |
| H522      | 7.014                                         | 1.938     |
| HCT116    | ~2.878                                        | 3.083     |

| Cell line | CI-994 IC <sub>50</sub> ( $\mu\text{M}$ ) |           |
|-----------|-------------------------------------------|-----------|
|           | Control                                   | Senescent |
| EJp53     | 14.72                                     | 14.43     |
| H522      | 10.86                                     | 11.05     |
| HCT116    | 5.881                                     | 4.648     |

| Cell line | Roctilinoestat IC <sub>50</sub> ( $\mu\text{M}$ ) |           |
|-----------|---------------------------------------------------|-----------|
|           | Control                                           | Senescent |
| EJp53     | 22.25                                             | 14.24     |
| H522      | 15.16                                             | 4.892     |
